# Supplementary material for: A tetracycline-selective fluorescent biosensor using anthranilic acid immobilized on a glutaraldehyde-coated eggshell membrane
Source: Royal Society of Chemistry journal article supplement (doi:10.1039/c5ay01047k), 2015-01-01
Supplement: c5ay01047k1.pdf [file c5ay01047k1.pdf]

**Electronic Supplementary Material**

**Tetracycline-Selective Fluorescent Biosensor Using Anthranilic Acid**

**Immobilized on Glutaraldehyde-Coated Eggshell Membrane**

Anyi Wang, Yunfei Bai, Hongye Gao, Shiping Wang

Fig. S1 SEM images of outer ESM after cross-linking with glutaraldehyde and AA, ×5000.

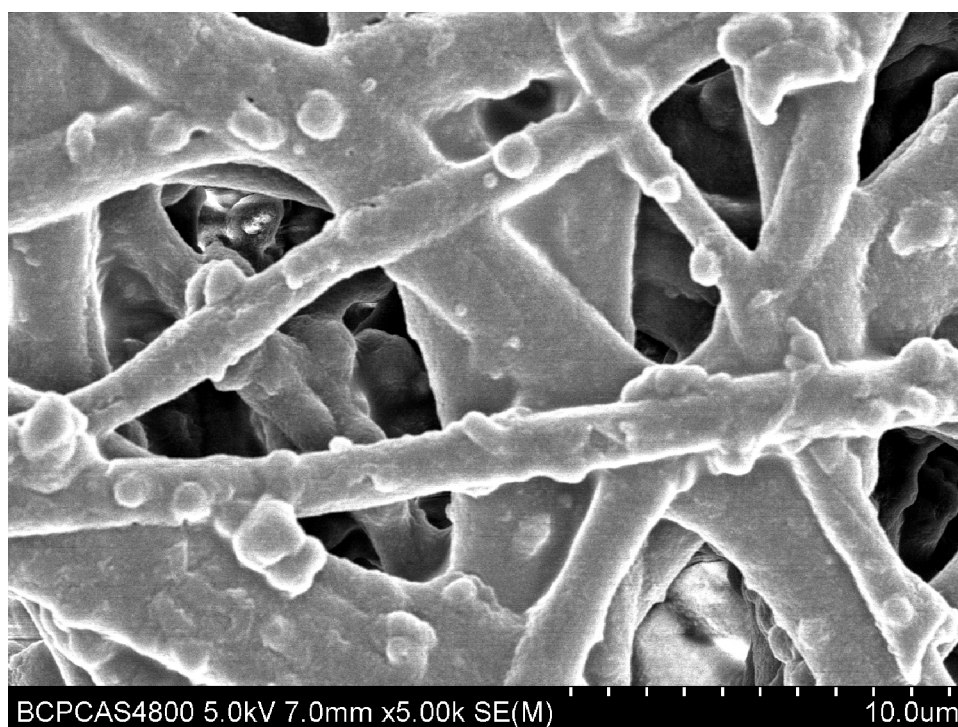

Table S1. Comparison between the developed method and previously reported ones

| Detection system                               | Reaction medium  | Linear range     | Detection limit | Real samples        | Refs                      |
|------------------------------------------------|------------------|------------------|-----------------|---------------------|---------------------------|
| Tc-H <sub>2</sub> O <sub>2</sub> -Fe(II)/(III) | Aqueous solution | 0.2~30 μM        | 50 nM           | Tablets and Honey   | ( Kaczmarek et al. 2008)  |
| Carbon dot-Tc                                  | Aqueous solution | 10 nM~1 mM       | 3.3 nM          | Urine samples       | (Feng et al. 2015)        |
| RhB-Tc-Au Nps                                  | Aqueous solution | 2.08 nM~1.04 μM  | 0.61 nM         | Water, urine , milk | ( Chen et al. 2004)       |
| EuTc-C18 layer                                 | Solid matrix     | 0-3000 mug/L     | 29 nM           | Milk                | ( Abolhasani et al. 2015) |
| AMP/Eu-Tc                                      | Aqueous solution | 0.1~20 μM        | 60 nM           | Milk                | (Tan et al. 2013)         |
| AATc-FL                                        | Solid matrix     | 10 ng/mL~1 μg/mL | 10 ng/mL        | Egg                 | This work                 |

M. Kaczmarek, A. Idzikowska and S. Lis, *J. Fluoresc.*, 2008, **18**, 1193-1197.

G. Chen and L. Liu, *J. Agric. Food Chem.*, 2004, **52**, 7199-7205.

Y. Feng, D. Zhong, H. Miao and X. Yang, *Talanta*, 2015, **140**, 128-133.

J. Abolhasani and N. Farajzadeh, *Luminescence*, 2015, **30**, 257-262.

H. L. Tan, C. J. Ma, Y. H. Song, F. G. Xu, S. H. Chen and L. Wang, *Biosens Bioelectron*, 2013, **50**, 447-452.
